# Supplementary material
Source: PubMed Central journal article supplement (PMC4222050)
Supplement: NIHMS543713-supplement-table.pdf [file NIHMS543713-supplement-table.pdf]

SUPPLEMENT TABLE 1. Detail information of combined datasets

(A) Seven brain cancer studies

| Tissue | Author     | Year | Platform       | Sample size | Comparison | Source   |
|--------|------------|------|----------------|-------------|------------|----------|
| Brain  | Petalidis  | 2008 | HG-U133A       | 65          | AA vs GBM  | GSE1993  |
| Brain  | Freije     | 2006 | HG-U133A,B     | 85          | AA vs GBM  | GSE4412  |
| Brain  | Phillips   | 2006 | HG-U133A,B     | 100         | AA vs GBM  | GSE4271  |
| Brain  | Sun        | 2006 | HG-U133_Plus.2 | 180         | AA vs GBM  | GSE4290  |
| Brain  | Paugh      | 2010 | HG-U133_Plus.2 | 53          | AA vs GBM  | GSE19578 |
| Brain  | Yamanaka   | 2006 | Agilent        | 29          | AA vs GBM  | GSE4381  |
| Brain  | Gravendeel | 2009 | HG-U133_Plus.2 | 284         | AA vs GBM  | GSE16011 |

6,005 genes remained in the combined dataset after gene matching (AA: Grade 3 Anaplastic astrocytoma; GBM: Grade 4 Glioblastoma multiforme)

(B) Nine MDD studies

| Study name    | Gender | Brain region | Sample size   | Platform   |
|---------------|--------|--------------|---------------|------------|
| MD1_ACC       | Male   | ACC          | 32 (16 pairs) | Affymetrix |
| MD3_ACC       | Female | ACC          | 44 (22 pairs) | Illumina   |
| C_MD2_ACC_F   | Female | ACC          | 18 (9 pairs)  | Affymetrix |
| C_MD2_ACC_M   | Male   | ACC          | 26 (13 pairs) | Affymetrix |
| MD1_AMY       | Male   | AMY          | 28 (14 pairs) | Affymetrix |
| MD3_AMY       | Female | AMY          | 42 (21 pairs) | Illumina   |
| C_MD2_DLPFC_F | Female | DLPFC        | 28 (14 pairs) | Affymetrix |
| C_MD2_DLPFC_M | Male   | DLPFC        | 32 (16 pairs) | Affymetrix |
| NY_DLPFC_M    | Male   | DLPFC        | 26 (13 pairs) | Affymetrix |

7,577 genes remained in the combined dataset after gene matching.

(C) 16 diabetes studies

| Study | Organism | Platform   | Description                                                                                                                                                                                      |
|-------|----------|------------|--------------------------------------------------------------------------------------------------------------------------------------------------------------------------------------------------|
| 1     | Mouse    | MG-U74Av2  | Brown preadipocyte IRS knockout profiling                                                                                                                                                        |
| 2     | Mouse    | MG-U74Av2  | Comparison of Low Fat and High Fat Diet on Mice of Two Genetic Backgrounds (B6 vs. 129) - Fat                                                                                                    |
| 3     | Mouse    | MG-U74Av2  | Comparison of Low Fat and High Fat Diet on Mice of Two Genetic Backgrounds (B6 vs. 129) - Liver                                                                                                  |
| 4     | Mouse    | MG-U74Av2  | Comparison of Low Fat and High Fat Diet on Mice of Two Genetic Backgrounds (B6 vs. 129) - Skeletal Muscle                                                                                        |
| 5     | Mouse    | MG-U74Av2  | Isolated adipocytes from normal and fat insulin receptor knockout (FIRKO) mice sorted into small and large cells                                                                                 |
| 6     | Mouse    | MG-U74Av2  | Liver - ob/ob mice                                                                                                                                                                               |
| 7     | Mouse    | MG-U74Av2  | Mouse skeletal muscle - controls, streptozotocin diabetes and insulin treated                                                                                                                    |
| 8     | Human    | HG-U133A,B | Human pancreatic islets from normal and Type 2 diabetic subjects                                                                                                                                 |
| 9     | Mouse    | MG-U74Av2  | Transcription profiling of wild type and PGC-1alpha KO liver and skeletal muscle                                                                                                                 |
| 10    | Mouse    | MG-U74Av2  | Effect of PGC-1alpha and PGC-1beta on gene expression in myocytes and hepatocytes                                                                                                                |
| 11    | Mouse    | MG-U74Av2  | Control Insulin Receptor (IR) and IRS-1 Single and Double Heterozygous (DH) Knockouts - Comparison of Age (6 weeks vs 6 months) and Genetic Background (B6 vs. 129) - Epididymal White Fat       |
| 12    | Mouse    | MG-U74Av2  | Control Insulin Receptor (IR) and IRS-1 Single and Double Heterozygous (DH) Knockouts - Comparison of Age (6 weeks vs 6 months) and Genetic Background (B6 vs. 129) - Liver                      |
| 13    | Mouse    | MG-U74Av2  | Control Insulin Receptor (IR) and IRS-1 Single and Double Heterozygous (DH) Knockouts <sub>1</sub> Comparison of Age (6 weeks vs 6 months) and Genetic Background (B6 vs. 129) - Skeletal Muscle |
| 14    | Mouse    | MG-U74Av2  | Effect of insulin infusion on skeletal muscle                                                                                                                                                    |
| 15    | Mouse    | MG-U74Av2  | Skeletal Muscle - Muscle Insulin Receptor Knockout and Control Mice - Control, Streptozotocin Diabetic and Insulin Treated                                                                       |
| 16    | Human    | HG-U133A   | Human skeletal muscle - type 2 diabetes - Swedish males                                                                                                                                          |

6,645 genes remained in the combined dataset after gene matching.

SUPPLEMENT TABLE 2. Mean FDRs for different methods in  $HS_r$  with  $r = 6$  by simulation analysis without correlated genes. The standard deviations of the FDRs in using 100 simulations are shown in the parentheses.

|                 | FDR <sub>1</sub>        | FDR <sub>2</sub>        |
|-----------------|-------------------------|-------------------------|
| rOP ( $r = 6$ ) | 0.0460 ( $\pm 0.0091$ ) | 0.2033 ( $\pm 0.0157$ ) |
| Fisher          | 0.0443 ( $\pm 0.0063$ ) | 0.4691 ( $\pm 0.0165$ ) |
| Stouffer        | 0.0442 ( $\pm 0.0071$ ) | 0.4045 ( $\pm 0.0148$ ) |
| minP            | 0.0442 ( $\pm 0.0070$ ) | 0.4790 ( $\pm 0.0161$ ) |
| maxP            | 0.0446 ( $\pm 0.0147$ ) | 0.0743 ( $\pm 0.0196$ ) |
| Vote Counting   | 0.0000 ( $\pm 0.0000$ ) | 0.0031 ( $\pm 0.0016$ ) |
