# Supplementary material
Source: PubMed Central journal article supplement (PMC4222050)
Supplement: NIHMS543713-supplement-text.pdf [file NIHMS543713-supplement-text.pdf]

## SUPPLEMENT TEXT

**One-sided test modification to avoid discordant effect sizes.** Owen (2009) and Pearson (1934) applied a one-sided test form of Fisher's method to address the possible discordance issue. Two Fisher scores are first obtained from left and right one-sided p-values:  $S^{Fisher;L} = -2 \sum_{k=1}^K \log(\tilde{p}_k)$  and  $S^{Fisher;R} = -2 \sum_{k=1}^K \log(1 - \tilde{p}_k)$ , where  $\tilde{p}_k$  is the left-sided p-value of study  $k$ . The one-sided corrected Fisher score is defined as  $S^{Fisher;C} = \max(S^{Fisher;L}, S^{Fisher;R})$ . Below we similarly modify the rOP method for a one-sided corrected form. Denote by  $S^{rOP;L} = \tilde{p}_{(r)}$ , where  $\tilde{p}_{(r)}$  is the  $r$ th order statistic of left one-sided p-values  $\{\tilde{p}_1, \tilde{p}_2, \dots, \tilde{p}_K\}$  from  $K$  studies. Similarly,  $S^{rOP;R} = \tilde{q}_{(r)}$ , where  $\tilde{q}_{(r)}$  is the  $r$ th order statistic of right one-sided p-values  $\{\tilde{q}_1, \tilde{q}_2, \dots, \tilde{q}_K\} = \{1 - \tilde{p}_1, 1 - \tilde{p}_2, \dots, 1 - \tilde{p}_K\}$  from  $K$  studies. The test statistic is defined as  $S^{rOP;C} = \min(S^{rOP;L}, S^{rOP;R})$ . Under the null hypothesis that the one-sided p-values  $\{\tilde{p}_1, \tilde{p}_2, \dots, \tilde{p}_K\}$  are independently and uniformly distributed in  $[0, 1]$ . The null distribution of  $S^{rOP;C}$  can be derived using integration by part. Equivalently, the null distribution could also be derived using the following property.

$$\begin{aligned} \Pr(S^{rOP;C} \leq p | H_0) &= \Pr(S^{rOP;L} \leq p \text{ or } S^{rOP;R} \leq p | H_0) \\ &= \Pr\left(\sum_{k=1}^K I(\tilde{p}_k \leq p) \geq r \text{ or } \sum_{k=1}^K I(\tilde{p}_k \geq 1 - p) \geq r \mid H_0\right) \end{aligned}$$

Because  $\sum_{k=1}^K I(\tilde{p}_k \leq p) \geq r$  and  $\sum_{k=1}^K I(\tilde{p}_k \geq 1 - p) \geq r$  are not mutually exclusive (except when  $r \geq [K/2] + 1$  and  $p \leq 0.5$ ), the above probability should be calculated differently as follows.

1. For  $r \geq [K/2] + 1$

(a) If  $p \leq 0.5$ ,

$$\Pr(S^{rOP;C} \leq p | H_0) = 2F(K-r; K, 1-p), \text{ where } F(K-r; K, 1-p) = \sum_{i=0}^{K-r} \binom{K}{i} (1-p)^i p^{K-i}$$

is the Binomial CDF for having  $K-r$  successes in  $K$  Bernoulli trials with success probability  $1-p$ .

(b) If  $p > 0.5$ ,

$$\Pr(S^{rOP;C} \leq p | H_0) = 1 - \sum_{i=K-r+1}^{r-1} \sum_{j=K-r+1}^{K-i} \frac{K!}{i!j!(K-i-j)!} (1-p)^{i+j} (2p-1)^{K-i-j}.$$

2. For  $r \leq [K/2]$

(a) If  $p \leq 0.5$ ,

$$\Pr(S^{rOP;C} \leq p | H_0) = 1 - \sum_{i=0}^{r-1} \sum_{j=0}^{r-1} \frac{K!}{i!j!(K-i-j)!} p^{i+j} (1-2p)^{K-i-j}.$$

(b) If  $p > 0.5$ ,

$$\Pr(S^{rOP;C} \leq p | H_0) = 1.$$

**References.**

- OWEN, A. B. (2009). Karl Pearson's meta-analysis revisited. *The Annals of Statistics* **37** 3867–3892.
- PEARSON, K. (1934). ON A NEW METHOD OF DETERMINING "GOODNESS OF FIT.". *Biometrika* **26** 425.
