# Supplementary material
Source: PubMed Central journal article supplement (PMC4222050)
Supplement: NIHMS543713-supplement-theorem.pdf [file NIHMS543713-supplement-theorem.pdf]

## SUPPLEMENT THEOREMS

**Theorem 1.** *When all  $K$  studies have equal effect sizes ( $\theta_1 = \dots = \theta_K = \theta \neq 0$ ) and the effect sizes are moderate (so that the single study power  $\Pr(p_k < \alpha | \theta_k = \theta) < \pi_0$ ), the power of vote counting converges to 0 when  $K \rightarrow \infty$ .*

*Proof.* Denote  $\pi = \Pr(p_k < \alpha | \theta_k = \theta)$ . Under the alternative hypothesis  $\theta_1 = \dots = \theta_K = \theta$ ,  $r \sim \text{BIN}(K, \pi)$  and  $r/K \rightarrow \pi$  as  $K \rightarrow \infty$ . Since  $\pi < \pi_0$ ,  $\Pr(\text{reject } H_0 | H_a) \rightarrow 0$ .  $\square$

**Theorem 2.** *When all  $K$  studies have equal effect sizes ( $\theta_1 = \dots = \theta_K = \theta \neq 0$ ) and the effect sizes are moderate but informative (so that the single study power satisfies  $\Pr(p_k < a | \theta_k = \theta \neq 0) > \Pr(p_k < a | \theta_k = 0) = a$ ,  $\forall 0 < a < 1$ ), the power of rOP for  $r$  under significance level  $\alpha$  converges to 1 when  $K \rightarrow \infty$  and  $r/K = c < 1$ .*

*Proof.* Denote  $\alpha_0 = B_\alpha(r, K - r + 1)$  (quantile of  $\text{Beta}(r, K - r + 1)$ ).  $\alpha_0$  is the critical value for a single study. When  $K \rightarrow \infty$ ,  $\text{Beta}(r, K - r + 1)$  has mean converges to  $r/K = c$  and variance converges to 0. As a result,  $\alpha_0 \rightarrow c$  as  $K \rightarrow \infty$ . Assume  $\Pr(p_k < \alpha_0 | \theta_k = \theta) = \alpha_0 + \epsilon$ , and  $\epsilon > 0$ . Denote  $m = \sum_{k=1}^K I(p_k < \alpha_0 | \theta_k = \theta)$ . For  $K \rightarrow \infty$ , by the law of large numbers,  $(m - r)/K = m/K - r/K \xrightarrow{p} \alpha_0 + \epsilon - c \xrightarrow{p} \epsilon > 0$ . Therefore  $\Pr(m \geq r) \rightarrow 1$  and the power of rOP =  $\Pr(\text{reject } H_0 | H_a) \rightarrow 1$ .  $\square$
